# Supplementary material for: Drag reduction on laser-patterned hierarchical superhydrophobic surfaces
Source: Royal Society of Chemistry journal article supplement (doi:10.1039/c6sm00436a), 2016-01-01
Supplement: c6sm00436a1.pdf [file c6sm00436a1.pdf]

Electronic Supplementary information for *Soft Matter*

## **Drag reduction on laser-patterned hierarchical superhydrophobic surfaces**

K. M. Tanvir Ahmmed<sup>a</sup> and Anne-Marie Kietzig<sup>\*a</sup>

<sup>a</sup>Department of Chemical Engineering, McGill University, Montréal, Québec, Canada

\*Corresponding author: [anne.kietzig@mcgill.ca](mailto:anne.kietzig@mcgill.ca)

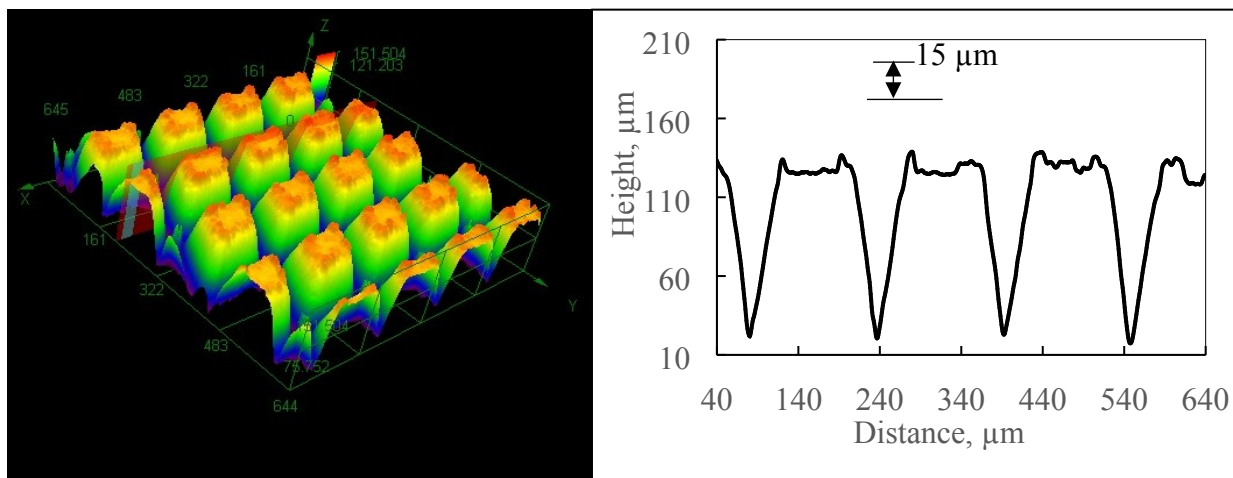

Figure S1. 3D confocal microscopy image of P6H sample: (a) the 3D profile and (b) a cross section of the height profile.

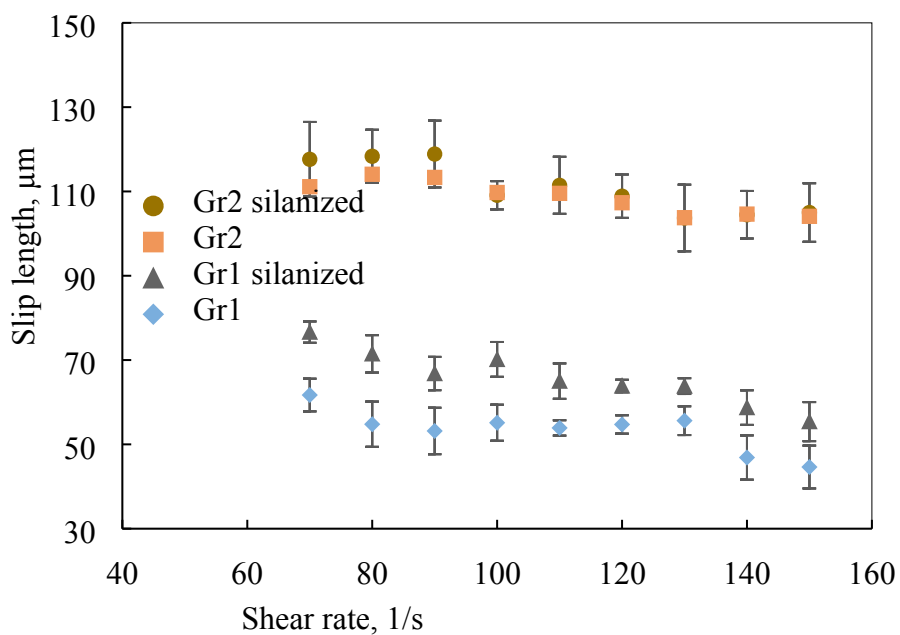

Figure S2. Slip lengths against shear rate for the silanized and the non-silanized Gr1 and Gr2 samples.

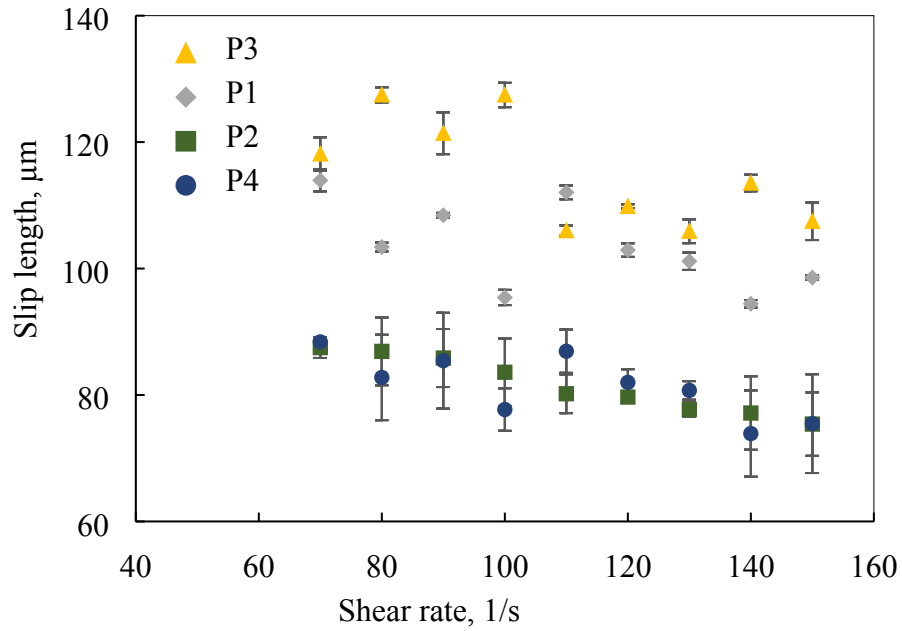

Figure S3. Slip lengths against shear rate for the non-silanzed P1, P2, P3, and P4 samples.

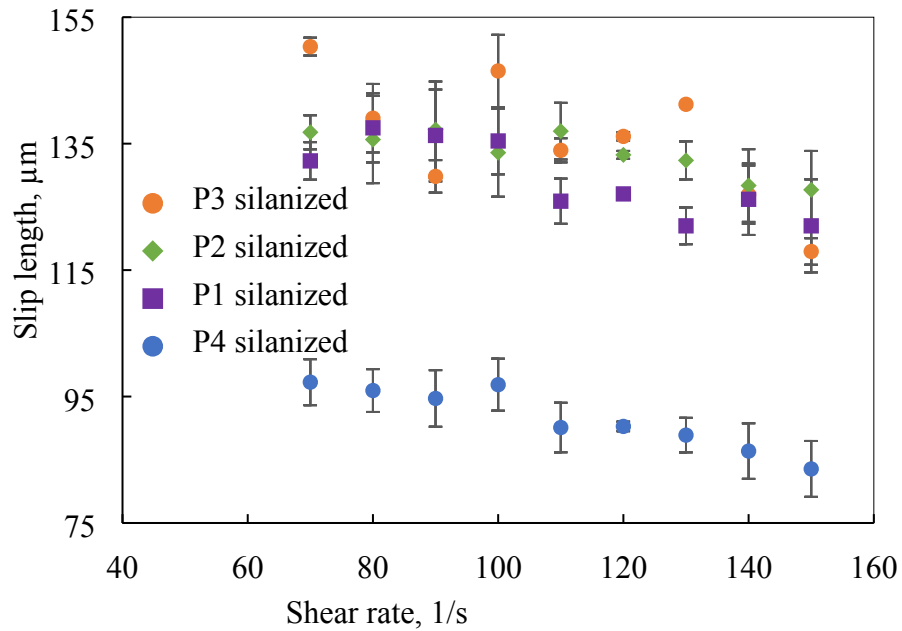

Figure S4. Slip lengths against shear rate for the silanzed P1, P2, P3, and P4 samples.

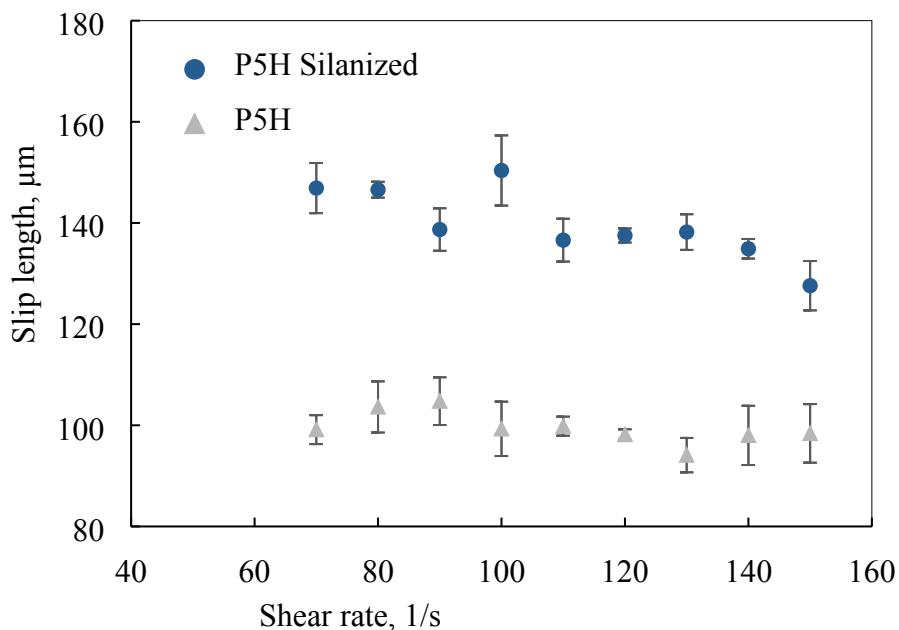

Figure S5. Slip lengths against shear rate for the silanized and the non-silanized P5H samples.

Table S1. Comparison between the overall mean slip lengths and the mean slip lengths at 110 s<sup>-1</sup> shear rate for all 8 samples along with the parameters of a statistical analysis.

| Samples | Slip length (μm) |                                   | Each pair student's t-test |       |
|---------|------------------|-----------------------------------|----------------------------|-------|
|         | Overall mean     | at 100 s <sup>-1</sup> shear rate | t (38)                     | p     |
| P1      | 129 ± 2          | 126 ± 4                           | 0.644                      | 0.524 |
| P2      | 134 ± 2          | 137 ± 4                           | 0.652                      | 0.518 |
| P3      | 136 ± 2          | 134 ± 2                           | -0.318                     | 0.752 |
| P4      | 92 ± 1           | 90 ± 4                            | -0.345                     | 0.732 |
| P5H     | 140 ± 2          | 137 ± 4                           | -0.602                     | 0.551 |
| P6H     | 113 ± 2          | 112 ± 4                           | -0.133                     | 0.895 |
| Gr1     | 66 ± 2           | 65 ± 4                            | -0.162                     | 0.872 |
| Gr2     | 111 ± 2          | 112 ± 7                           | 0.089                      | 0.929 |

Table S2. Comparison between the slip lengths obtained on the silanized and the non-silanized samples. Relevant parameters of a statistical analysis for finding the significant differences between the silanized and the non-silanized samples are included.

| Samples | Slip length ( $\mu\text{m}$ ) |             | Each pair student's t-test |         |
|---------|-------------------------------|-------------|----------------------------|---------|
|         | Non-silanized                 | Silanized   | t (6)                      | p       |
| P1      | 112 $\pm$ 1                   | 126 $\pm$ 4 | 3.705                      | 0.0100  |
| P2      | 80 $\pm$ 3                    | 137 $\pm$ 4 | 10.458                     | <0.0001 |
| P3      | 106 $\pm$ 1                   | 134 $\pm$ 2 | 13.459                     | <0.0001 |
| P4      | 87 $\pm$ 3                    | 90 $\pm$ 4  | 0.610                      | 0.5641  |
| P5H     | 100 $\pm$ 2                   | 137 $\pm$ 4 | 7.935                      | 0.0002  |
| Gr1     | 54 $\pm$ 2                    | 65 $\pm$ 4  | 2.429                      | 0.0512  |
| Gr2     | 110 $\pm$ 3                   | 112 $\pm$ 7 | 0.262                      | 0.8020  |

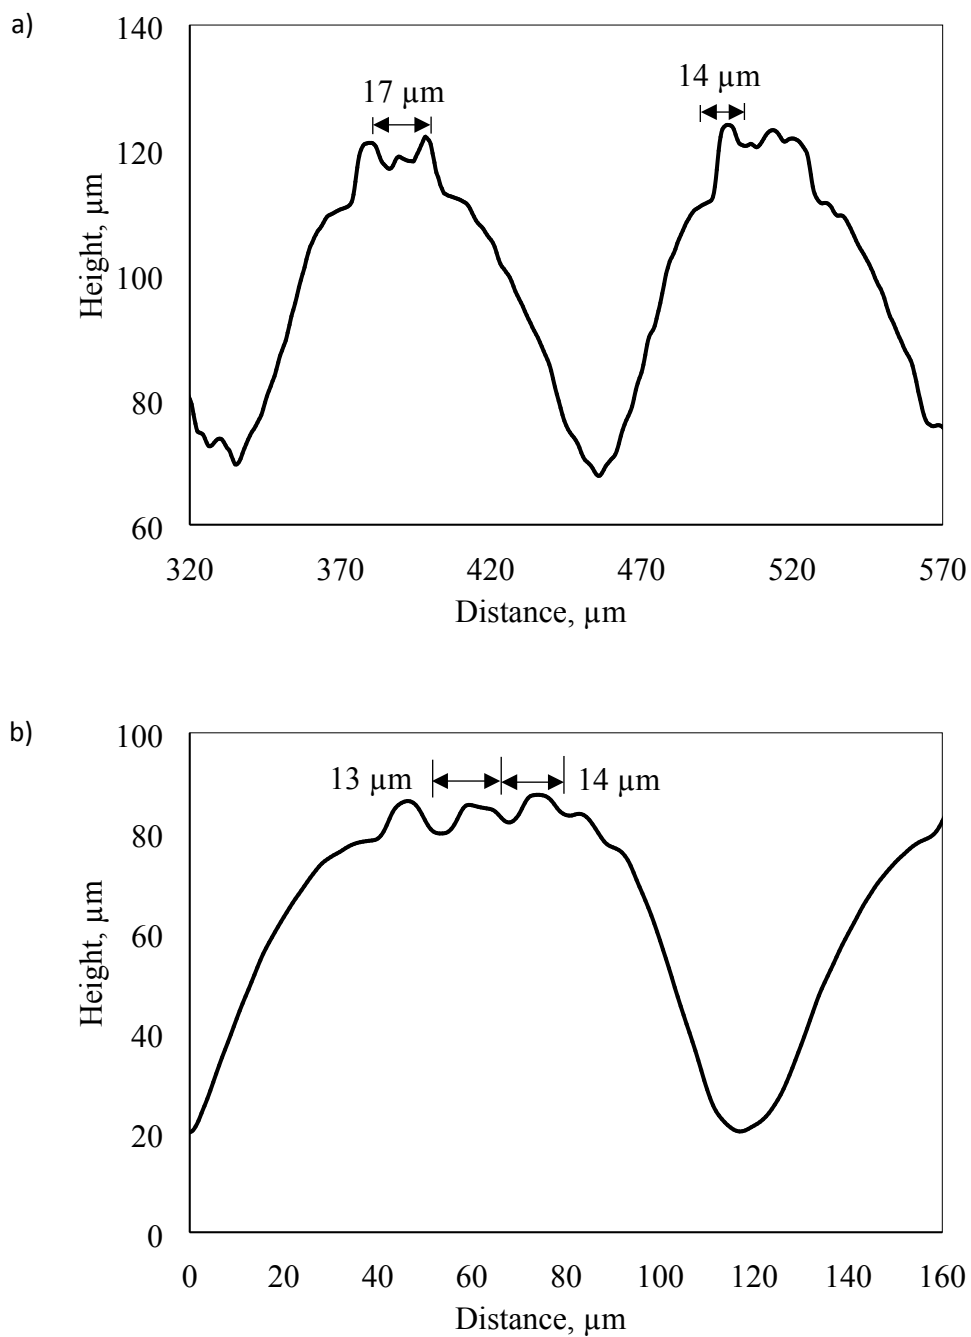

Figure S6. Profilometer data for sample P3 at (a) Longitudinal, and (b) transverse cross sections. The distances between micro-columns in longitudinal and transverse sections are almost alike, thus it leads to the assumption of a square pillar arrangement.
